1 **Older adults mount less durable humoral responses to two doses of COVID-19 mRNA vaccine,**  
2 **but strong initial responses to a third dose**

3

4 Francis Mwimanzi<sup>1</sup>, Hope R. Lapointe<sup>2</sup>, Peter K. Cheung<sup>1,2</sup>, Yurou Sang<sup>1</sup>, Fatima Yaseen<sup>1</sup>, Gisele  
5 Umviligihozo<sup>1</sup>, Rebecca Kalikawe<sup>1</sup>, Sneha Datwani<sup>1</sup>, F. Harrison Omondi<sup>1,2</sup>, Laura Burns<sup>3</sup>, Landon  
6 Young<sup>3</sup>, Victor Leung<sup>4,5</sup>, Olga Agafitei<sup>1</sup>, Siobhan Ennis<sup>1</sup>, Winnie Dong<sup>2</sup>, Simran Basra<sup>1</sup>, Li Yi Lim<sup>1</sup>,  
7 Kurtis Ng<sup>1</sup>, Ralph Pantophlet<sup>1</sup>, Chanson J. Brumme<sup>2,4</sup>, Julio S.G. Montaner<sup>2,4</sup>, Natalie Prystajecy<sup>5,6</sup>,  
8 Christopher F. Lowe<sup>3,5</sup>, Mari L. DeMarco<sup>3,5</sup>, Daniel T. Holmes<sup>3,5</sup>, Janet Simons<sup>3,5</sup>, Masahiro Niikura<sup>1</sup>,  
9 Marc G. Romney<sup>3,5,\*</sup>, Zabrina L. Brumme<sup>1,2,\*</sup>, Mark A. Brockman<sup>1,2,\*</sup>

10

11 1. Faculty of Health Sciences, Simon Fraser University, Canada;

12 2. British Columbia Centre for Excellence in HIV/AIDS, Canada;

13 3. Division of Medical Microbiology and Virology, St. Paul's Hospital, Canada;

14 4. Department of Medicine, University of British Columbia, Canada;

15 5. Department of Pathology and Laboratory Medicine, University of British Columbia, Canada

16 6. British Columbia Centre for Disease Control Public Health Laboratory, Vancouver, Canada

17 \*MAB, MGR and ZLB contributed equally

18

19 **Corresponding Author Contact Information:**

20 Mark A. Brockman, Ph.D.

21 Professor, Faculty of Health Sciences, Simon Fraser University

22 8888 University Drive, Burnaby, BC, Canada, V5A 1S6

23 Tel: 778 782-3341; Fax: 778-782-5927; email: [mark\\_brockman@sfu.ca](mailto:mark_brockman@sfu.ca)

24 **ABSTRACT**

25 **Background:** Third COVID-19 vaccine doses are broadly recommended, but immunogenicity data  
26 remain limited, particularly in older adults.

27 **Methods:** We measured circulating antibodies against the SARS-CoV-2 spike protein receptor-binding  
28 domain, ACE2 displacement, and virus neutralization against ancestral and Omicron (BA.1) strains  
29 from pre-vaccine up to one month following the third dose, in 151 adults aged 24-98 years who  
30 received COVID-19 mRNA vaccines.

31 **Results:** Following two vaccine doses, humoral immunity was weaker, less functional and less durable  
32 in older adults, where a higher number of chronic health conditions was a key correlate of weaker  
33 responses and poorer durability. Third doses boosted antibody binding and function to higher levels  
34 than second-doses, and induced responses in older adults that were comparable in magnitude to those in  
35 younger adults. Humoral responses against Omicron were universally weaker than against the ancestral  
36 strain after both second and third doses; nevertheless, after three doses, anti-Omicron responses in older  
37 adults reached equivalence to those in younger adults. After three vaccine doses, the number of chronic  
38 health conditions, but not age per se, was the strongest consistent correlate of weaker humoral  
39 responses.

40 **Conclusion:** Results underscore the immune benefits of third COVID-19 vaccine doses, particularly in  
41 older adults.

42

43 **Key words:** COVID-19, mRNA vaccine, SARS-CoV-2, humoral immunity, older adults, binding  
44 antibodies, ACE2 displacement, viral neutralization, Omicron

45

46 **INTRODUCTION**

47 Older adults are at increased risk of lethal COVID-19 following SARS-CoV-2 infection  
48 (SARS-CoV-2) [1-3]. While two doses of a COVID-19 mRNA vaccine broadly protects against  
49 hospitalization and death [4-6], weaker vaccine-induced immunity observed in the elderly and certain  
50 other groups [7-12] has led to their prioritization to receive third doses [13-16]. Vaccine-induced  
51 antibodies also decline over time, which can increase the risk of breakthrough infections [17-19],  
52 particularly with the more transmissible and immune evasive Omicron variant (B.1.1.529) [20-22].

53 We and others have shown that older age is associated with weaker antibody responses to  
54 COVID-19 mRNA vaccines, Comirnaty (Pfizer/BioNTech) and Spikevax (Moderna) [10-12]. We  
55 previously characterized longitudinal humoral responses up to three months after the second vaccine  
56 dose in a cohort of 151 adults 24 to 98 years of age that includes COVID-19 naïve and convalescent  
57 individuals [12]. Here, we examine binding and neutralizing antibody responses up to six months  
58 following the second vaccine dose, as well as one month following the third vaccine dose. We also  
59 evaluate binding antibodies, ACE2 displacement, and virus neutralization against Omicron (BA.1) one  
60 month following the second and third doses.

61

## 62 **METHODS**

63 **Study design.** We conducted a prospective longitudinal cohort study in British Columbia, Canada, to  
64 examine SARS-CoV-2 specific humoral responses following vaccination with Comirnaty or Spikevax.  
65 Our cohort of 151 individuals included 81 healthcare workers (HCW) and 56 older adults (including 18  
66 residents of long-term care or assisted living facilities) who were COVID-19 naive at study entry, and  
67 14 COVID-19 convalescent individuals with anti-SARS-CoV-2 N antibodies at study entry (including  
68 8 HCW and 6 older adults) [12]. Serum and plasma were collected prior to vaccination; one month  
69 after the first dose; one, three and six months after the second dose; and one month following the third  
70 dose. Specimens were processed same-day and frozen until analysis.

71

72 **Ethics approval.** Written informed consent was obtained from all participants or their authorized  
73 decision makers. This study was approved by the University of British Columbia/Providence Health  
74 Care and Simon Fraser University Research Ethics Boards.

75

76 **Data sources.** Sociodemographic, health and vaccine information was collected by self-report and  
77 confirmed through medical records where available. Chronic health conditions were defined as  
78 hypertension, diabetes, asthma, obesity (body mass index  $\geq 30$ ), chronic diseases of lung, liver, kidney,  
79 heart or blood, cancer, and immunosuppression due to chronic conditions or medication, to generate a  
80 score ranging from 0-11 per participant [12].

81

82 **Binding antibody assays.** We measured total binding antibodies against SARS-CoV-2 nucleocapsid  
83 (N) and spike (S) receptor binding domain (RBD) in serum using the Roche Elecsys Anti-SARS-CoV-  
84 2 and Anti-SARS-CoV-2 S assays, respectively, on a Cobas e601 module analyzer (Roche

85 Diagnostics). Following SARS-CoV-2 infection, both assays should be positive, whereas post-  
86 vaccination only the S assay should be positive, allowing identification of convalescent individuals.  
87 Both tests are electro-chemiluminescence sandwich immunoassays, and report results in Arbitrary  
88 Units (AU)/mL, calibrated against an external standard. For the S assay, the manufacturer indicates that  
89 AU values can be considered equivalent to international binding antibody units (BAU) as defined by  
90 the World Health Organization [23]. For the S assay, sera were tested undiluted, with samples above  
91 the upper limit of quantification (ULOQ) re-tested at 1:100 dilution, allowing a measurement range of  
92 0.4 - 25,000 U/mL. We also quantified plasma IgG binding antibodies against RBD using the V-plex  
93 SARS-CoV-2 (IgG) Panel 22 ELISA kit (Meso Scale Diagnostics), which features the ancestral  
94 (Wuhan) and Omicron RBD antigens, on a Meso QuickPlex SQ120 instrument. Plasma samples were  
95 diluted 1:10000 as directed by the manufacturer, with results reported in Arbitrary Units (AU)/mL.

96

97 ***ACE2 competition assay.*** We assessed the ability of plasma antibodies to block the RBD-ACE2  
98 receptor interaction by competition ELISA (Panel 22 V-plex SARS-CoV-2 [ACE2]; Meso Scale  
99 Diagnostics) on a Meso QuickPlex SQ120 instrument. Plasma was diluted 1:20 as directed by the  
100 manufacturer and results reported as % ACE2 displacement.

101

102 ***Live virus neutralization.*** Neutralizing activity in plasma was examined using a live SARS-CoV-2  
103 infectivity assay in a Containment Level 3 facility. Assays were performed using isolate USA-  
104 WA1/2020 (BEI Resources) and a local Omicron isolate (BA.1 strain; GISAID Accession #  
105 EPI\_ISL\_9805779) on VeroE6-TMPRSS2 (JCRB-1819) target cells. Viral stock was adjusted to 50  
106 TCID<sub>50</sub>/200 µl in Dulbecco's Modified Eagle Medium in the presence of serial 2-fold dilutions of  
107 plasma (from 1/20 to 1/2560), incubated at 4°C for 1 hour and then added to target cells in 96-well

108 plates in triplicate. Cultures were maintained at 37°C with 5% CO<sub>2</sub> and the appearance of viral  
109 cytopathic effect (CPE) was recorded three days post-infection. Neutralizing activity is reported as the  
110 highest reciprocal plasma dilution able to prevent CPE in all three replicate wells. Samples exhibiting  
111 only partial or no neutralization at the lowest dilution of 1/20 were coded as having a reciprocal  
112 dilution of "10", defined as below the limit of quantification (BLOQ) in this assay.

113

114 ***Statistical analysis.*** Comparisons of binary variables were performed using Fisher's exact test.

115 Comparisons of continuous variables were performed using the Mann-Whitney U-test (for unpaired

116 data) or Wilcoxon test (for paired data). Multiple linear regression was used to investigate the

117 relationship between sociodemographic, health and vaccine-related variables and humoral outcomes.

118 Variables included age (per year increment), sex at birth (female as reference group), ethnicity (non-

119 white as reference), number of chronic health conditions (per number increment), mRNA vaccine

120 received (Comirnaty as reference), interval between doses (per day increment), sampling date

121 following the most recent dose (per day increment), and convalescent status (COVID-19 naive as

122 reference). Binding antibody half-lives in serum were calculated by fitting exponential decay curves to

123 antibody concentrations at one, three and six months after the second dose. All tests were two-tailed,

124 with  $p < 0.05$  considered statistically significant. Analyses were conducted using Microsoft Excel and

125 Prism v9.2.0 (GraphPad).

126

127 **RESULTS**

128 *Participant characteristics*

129 As described previously [12], the cohort is predominantly female (**Table 1**). HCW, older adults  
130 and COVID-19 convalescent individuals at study entry were a median of 41, 79 and 48 years old,  
131 respectively. Older adults were predominantly (77%) of white ethnicity (compared to 46% of HCW)  
132 and had a higher burden of chronic health conditions (a median of 1, interquartile range [IQR] 0-2,  
133 range 0-5, vs. a median of 1, IQR 0-0, range 0-3 in HCW). All participants received two COVID-19  
134 mRNA vaccine doses between December 2020-July 2021, where the dose interval was up to 112 days  
135 as per national guidelines to delay second doses due to initially limited vaccine supply. A total of 141  
136 (93%) and 138 (91%) of participants received Comirnaty as their first and second dose, respectively. At  
137 the time of writing, 114 participants had received a third dose between October-December 2021, on  
138 average 7 months following their second dose. For participants whose third dose was Spikevax (53% of  
139 the cohort), those aged  $\geq 70$  years received a full dose, whereas those  $< 70$  years received a half-dose, as  
140 per national guidelines. An additional six (7.4%) HCW and two (3.6%) older adults developed anti-N  
141 antibodies during follow-up, reflecting breakthrough infections. Three of these infections, all in HCW,  
142 occurred between December 2021-Jan 2022 and are likely Omicron. In longitudinal analyses that span  
143 the entire study, participants with a post-vaccination SARS-CoV-2 infection are retained in their  
144 original "COVID-19 naive at study entry" groups but identified in the Figures, while in analyses that  
145 focus on third dose responses, they are grouped in a single "prior COVID-19" group.

146

147 *After two-dose vaccination, lower binding antibodies are associated with older age and burden of*  
148 *chronic health conditions, but older adults mount strong responses after a third dose.*

149 We measured total anti-RBD binding antibody concentrations in serum before and after  
150 immunization (**Figure 1A**). As reported previously [12], antibody concentrations in older adults were  
151 significantly lower than those in HCW one month after the first dose (a median of 2.00 [IQR 1.75-2.25]  
152  $\log_{10}$  U/mL in HCW versus a median of 1.50 [IQR 1.05-1.99] in older adults), as well as one month  
153 after the second dose (a median of 4.02 [IQR 3.88-4.25] in HCW versus a median of 3.74 [IQR 3.49-  
154 3.91] in older adults) (Mann-Whitney; both  $p < 0.0001$ ). Three months following the second dose,  
155 antibody concentrations had declined by  $\sim 0.4 \log_{10}$  on average, to a median of 3.63 [IQR 3.44-3.83] in  
156 HCW versus a median 3.32 [IQR 3.04-3.56] in older adults) (Mann-Whitney  $p < 0.0001$  for comparison  
157 between groups). Six months following the second dose, antibody concentrations had declined by a  
158 further  $\sim 0.3 \log_{10}$  on average, to a median of 3.30 [IQR 3.09-3.47] in HCW versus a median 2.96 [IQR  
159 2.68-3.20] in older adults ( $p < 0.0001$ ). This confirms that, following two-dose COVID-19 mRNA  
160 vaccination, antibody concentrations remain consistently and significantly lower in older compared to  
161 younger adults. By contrast, antibody concentrations in COVID-19 convalescent individuals remained  
162 consistently higher than COVID-19 naive individuals at all time points after two doses. Six months  
163 after the second dose for example, convalescent individuals maintained median responses of 3.50 (IQR  
164 3.40-3.71)  $\log_{10}$  U/mL ( $p = 0.027$  compared to HCW;  $p < 0.0001$  compared to older adults).

165 Multivariable analyses of antibody concentrations after two doses, that adjusted for sex ,  
166 ethnicity, number of chronic health conditions, first-dose vaccine brand, dosing interval and day of  
167 specimen collection post-immunization confirmed that older age remained independently associated  
168 with lower antibody concentrations at one and three months after the second dose (**Table S1**). One  
169 month following the second dose for example, each decade of older age was associated with an  $\sim 0.06$   
170  $\log_{10}$  lower antibody concentration ( $p = 0.0067$ ). A higher number of chronic conditions was also  
171 independently associated with lower antibody concentrations at both these time points. Six months



172 following the second dose, a higher number of chronic health conditions remained the strongest  
173 independent correlate of lower responses, with each additional condition associated with an 0.14 log<sub>10</sub>  
174 lower antibody concentration (p=0.0001). A longer dose interval was also associated with higher  
175 antibody concentrations at all time points after the second dose (all p<0.05), consistent with previous  
176 reports [24-26]. COVID-19 convalescent status was also associated with maintaining 0.26 log<sub>10</sub> higher  
177 antibody concentrations at three and six months following the second dose (both p<0.05), consistent  
178 with superior durability of “hybrid” immunity induced by infection followed by vaccination [27-29].

179 In both HCW and older adults, the third dose boosted antibody concentrations at least ~0.3-0.4  
180 log<sub>10</sub> higher than peak values observed after two doses (Wilcoxon paired test p<0.0001 for both  
181 groups). Binding antibodies in HCW rose to a median of 4.31 (IQR 4.13 to upper limit of quantification  
182 [ULOQ]) whereas those in older adults rose to a median of 4.33 (4.14 to ULOQ) (p=0.33), indicating  
183 that older and younger adults mounted comparable initial binding antibody responses following a third  
184 dose. In multivariable analyses of third-dose responses, a higher number of chronic health conditions  
185 was the sole significant correlate of lower antibody concentrations (p=0.0078), while having received  
186 Spikevax as the third dose was associated with higher antibody concentrations (p=0.0091) (**Table S2**).

187

188 *After two-dose vaccination, weaker virus neutralizing activity is associated with age and chronic*  
189 *health conditions, but older adults mount strong responses after a third dose.*

190 We performed live SARS-CoV-2 neutralization assays to quantify the ability of plasma to block  
191 virus infection of target cells (**Figure 1B**). Neutralizing activity is reported as the highest reciprocal  
192 plasma dilution capable of preventing viral cytopathic effects in all wells of a triplicate assay, where a  
193 reciprocal dilution of "10" indicates no or limited neutralization. As previously reported [12], one  
194 vaccine dose largely failed to induce neutralizing activity in COVID-19 naïve individuals, though two

195 doses induced this activity in most participants, albeit at consistently lower levels in older compared to  
196 younger adults. One month after the second dose for example, the median reciprocal dilution was 160  
197 [IQR 80-160] in HCW versus 40 [IQR 20-80] in older adults ( $p<0.0001$ ). Three months after the  
198 second dose, neutralizing activity had declined by more than two-fold on average, to a median  
199 reciprocal dilution of 40 (IQR 20-80) in HCW versus a median of 20 (IQR BLOQ-40) in older adults  
200 ( $p<0.0001$ ). Six months after the second dose, neutralizing activity had declined to below the limit of  
201 quantification (BLOQ) in 58% of HCW and 83% of older adults (Mann-Whitney  $p=0.0048$  for  
202 comparison between groups). COVID-19 convalescent individuals by contrast maintained significantly  
203 higher neutralizing activity compared to naive individuals at all time points following two-dose  
204 vaccination. Multivariable analyses confirmed that older age remained significantly associated with  
205 weaker neutralizing activity at one and three months after two-dose vaccination, while COVID-19  
206 convalescent status was associated with superior neutralizing activity at all time points following two-  
207 dose vaccination (all  $p\leq 0.0002$ ) (**Table S1**).

208 A third vaccine dose boosted neutralizing activity in both HCW and older adults, achieving  
209 responses that were two-fold and eight-fold higher than peak values after two doses, respectively  
210 (Wilcoxon paired test  $p\leq 0.006$  for both groups; **Figure 1B**). Specifically, the median reciprocal dilution  
211 in HCW and older adults rose to 320 [IQR 160-320] and 320 [IQR 80-320], respectively ( $p=0.6$ ),  
212 indicating that older adults mounted comparable neutralizing responses to younger adults after three  
213 doses. A multivariable analysis identified prior COVID-19 as the strongest independent predictor of  
214 higher neutralizing activity after a third vaccine dose ( $p=0.0044$ ; **Table S2**).

215

216 *After two-dose vaccination, binding antibody responses decline faster in those with a higher burden*  
217 *of chronic conditions.*

218 We next assessed temporal reductions in antibody concentrations after two-dose vaccination  
219 (**Figure 2A**). Assuming exponential decay and restricting the analysis to participants with a complete  
220 longitudinal data series with no values above the ULOQ, we estimated antibody concentration half-  
221 lives to be a median of 59 [IQR 52-75] days in HCW versus a median of 52 [IQR 45-65] days in older  
222 adults ( $p=0.016$ ; **Figure 2B**). This suggests that, in addition to mounting overall weaker responses to  
223 two-dose vaccination compared to younger adults, antibody concentrations in older adults also decline  
224 more rapidly. In multivariable analyses however, a higher number of chronic health conditions  
225 emerged as the sole independent correlate of antibody decline, with each additional condition  
226 associated with a 5-day shorter half-life ( $p=0.017$ ; **Table 2**). Furthermore, COVID-19 convalescent  
227 status was associated with a 14-day longer antibody half-life after adjustment for other factors  
228 ( $p=0.056$ ), consistent with improved durability of hybrid immunity [27-29].

229

### 230 *Humoral responses against Omicron following two and three vaccine doses*

231 Given the rapid rise of the Omicron variant, we compared peak antibody responses against this  
232 strain in plasma collected at one month after the second and third vaccine doses. Here, we grouped all  
233 participants with prior COVID-19, regardless of infection timing, in the convalescent category. Overall,  
234 IgG binding antibodies against the Omicron RBD, measured using the Meso Scale Diagnostics V-Plex  
235 assay, were on average 0.4 to 0.5  $\log_{10}$  U/mL lower than those against the wild type (WT; ancestral  
236 Wuhan strain) RBD antigen after two and three doses (all within-group comparisons  $p \leq 0.0002$ ; **Figure**  
237 **3A**). Nevertheless, the third dose universally boosted anti-Omicron IgG concentrations to an average of  
238 0.5  $\log_{10}$  higher than levels induced by two doses (all within-group comparisons  $p < 0.05$ ). Consistent  
239 with total binding antibody concentrations quantified using the Roche assay (**Figure 1A**), binding IgG  
240 concentrations against the WT RBD were significantly higher in HCW compared to older adults after

241 two doses ( $p < 0.0001$ ) but reached equivalence after three doses ( $p = 0.4$ ). IgG concentrations capable of  
242 binding Omicron followed a similar pattern, with HCW showing marginally higher anti-Omicron IgG  
243 levels compared to older adults after two doses ( $p = 0.09$ ), but equivalent levels after three doses  
244 ( $p = 0.49$ ). A multivariable analysis of Omicron-specific IgG concentrations after three doses identified a  
245 higher number of chronic health conditions as the strongest correlate of poorer responses, with each  
246 additional condition associated with a 0.12  $\log_{10}$  reduction in Omicron binding IgG ( $p = 0.0033$ ; **Table**  
247 **3**). A longer interval between the first and second vaccine doses was marginally associated with a  
248 lower third dose response ( $p = 0.02$ ).

249 We also assessed the ability of plasma to block the interaction between WT and Omicron RBD  
250 and the cellular ACE2 receptor, which represents a higher throughput approach to estimate potential  
251 virus neutralizing activity (also referred to as a surrogate virus neutralization test [30]). This activity  
252 was significantly weaker against Omicron compared to WT RBD after both two and three doses in all  
253 groups (all within-group comparisons  $p \leq 0.0002$ ; **Figure 3B**), though the discrepancy was most  
254 pronounced for older adults after two doses (where median activity against WT was 90% compared to  
255 only 23% against Omicron). The third dose universally boosted anti-Omicron activity (all within-group  
256 comparisons  $p < 0.05$ ), with, for example, median anti-Omicron activity in older adults rising from 23%  
257 after two doses to 66% after three. Consistent with results for binding IgG antibodies, surrogate  
258 neutralization of WT RBD was significantly higher in HCW compared to older adults after two doses  
259 ( $p < 0.0001$ ), but reached equivalence after three doses (in fact, activities in older adults were slightly  
260 higher at this time point;  $p = 0.08$ ). Surrogate neutralization of Omicron RBD followed a similar pattern,  
261 with HCW exhibiting significantly higher activity compared to older adults after two doses ( $p < 0.0001$ ),  
262 but equivalent levels after three doses ( $p = 0.2$ ). In multivariable analyses, a higher number of chronic  
263 health conditions was the strongest correlate of poorer surrogate neutralizing activity against Omicron

264 after three vaccine doses, with each additional condition associated with a ~6% reduction in this  
265 activity ( $p=0.0046$ ; **Table 3**). Male sex, a longer interval between the first and second doses, and the  
266 number of days elapsed since the third dose also correlated with weaker responses after three doses (all  
267  $p<0.05$ ).

268 Finally, we assessed plasma neutralizing activity against WT (ancestral USA-WA1/2020 strain)  
269 and Omicron using a live virus assay in a subset of 20 HCW and 21 older adults who remained  
270 COVID-19 negative throughout the study (**Figure 4**). Neutralizing activity against Omicron was  
271 significantly weaker compared to WT following two and three doses in both groups (all  $p<0.0001$ ). The  
272 third dose nevertheless boosted anti-Omicron activity in both groups, where the increase in older adults  
273 was particularly pronounced (from a median of BLOQ after the second dose to a median reciprocal  
274 dilution of 40 after the third;  $p<0.0001$ ). Consistent with binding IgG and surrogate neutralization  
275 results, anti-Omicron neutralizing activity was significantly lower in older adults compared to HCW  
276 after two vaccine doses ( $p=0.0003$ ) but reached equivalence after the third dose ( $p=0.79$ ).

277

278 **DISCUSSION**

279 At every time point following two doses of COVID-19 mRNA vaccine, antibody binding and  
280 neutralizing activity were significantly weaker in older compared to younger adults. Antibody  
281 concentrations were also less durable in older adults, though responses declined substantially in all  
282 groups over time (*e.g.* by six months after the second dose, neutralizing activities had declined to  
283 BLOQ in almost 60% of HCW and >80% of older adults). In multivariable analyses adjusting for  
284 sociodemographic, health and vaccine-related variables, a higher number of chronic health conditions  
285 remained consistently and independently associated with weaker and less durable binding antibody  
286 responses, while a longer interval between first and second doses was consistently associated with  
287 higher binding antibody responses after the second dose, as previously reported [24-26]. These findings  
288 support public health decisions to provide third doses on or before the six-month mark, with older  
289 adults receiving priority.

290 Third doses of COVID-19 vaccine increased antibody binding and neutralizing function to  
291 levels that were significantly higher than those achieved by two doses, where the magnitude of  
292 boosting in older adults was particularly prominent. Indeed, antibody binding, surrogate neutralization  
293 and live virus neutralization activities in older adults were equivalent to those observed in younger  
294 adults after three doses. Consistent with recent evidence [20, 21, 31-37], antibody responses against  
295 Omicron were universally weaker than those against the ancestral strain after both two and three  
296 vaccine doses; nevertheless, anti-Omicron responses in older adults reached equivalence to those  
297 observed in younger adults after three doses. Notably, the number of chronic health conditions  
298 persisted as an independent correlate of weaker anti-Omicron responses, even after three doses.

299 Similar to other reports [27-29], our findings indicate that individuals who have contracted  
300 COVID-19 are likely to benefit from vaccination. Compared to naïve participants, convalescent

301 individuals displayed a slower rate of antibody decline, and multivariable analyses demonstrated that  
302 binding and neutralization activity was higher in this group at six months after the second dose .

303 Our study has several limitations. As the precise immune correlates of protection for SARS-  
304 CoV-2 transmission and disease severity remain incompletely characterized [38], the implications of  
305 our results on individual-level protection from SARS-CoV-2 infection and COVID-19 remain  
306 uncertain. We did not investigate T-cell responses, which may play critical roles in protection against  
307 severe COVID-19, particularly in the context of variants [39-46]. Our study was not powered to  
308 investigate potential differences in immune responses between the two mRNA vaccines [47, 48], nor  
309 differences in full vs. half-doses of Spikevax when administered as third doses to individuals  $\geq 70$   
310 versus  $< 70$  years old, respectively, in Canada. Third dose responses were measured at a single time  
311 point, so durability assessments are needed. Nevertheless, results provide additional insight into  
312 COVID-19 mRNA vaccine immunogenicity in the elderly and in the context of an extended interval  
313 between first and second doses (of up to 112 days).

314 In conclusion, while the observation of strong binding and neutralizing antibody responses to  
315 third COVID-19 vaccine doses in older adults, including to Omicron, are encouraging, it will be  
316 important to closely monitor the durability of these responses over time in this population.

317

## 318 **ACKNOWLEDGEMENTS**

319           We thank the leadership and staff of Providence Health Care, including long-term care and  
320 assisted living residences, for their support of this study. We thank the phlebotomists and laboratory  
321 staff at St. Paul's Hospital, the BC Centre for Excellence in HIV/AIDS and Simon Fraser University for  
322 assistance. Above all, we thank the participants, without whom this study would not have been  
323 possible.

324

## 325 **FUNDING**

326           This work was supported by the Public Health Agency of Canada through a COVID-19  
327 Immunology Task Force COVID-19 "Hot Spots" Award (2020-HQ-000120 to MGR, ZLB, MAB).  
328 Additional funding was received from the Canadian Institutes for Health Research (GA2-177713 and  
329 the Coronavirus Variants Rapid Response Network (FRN-175622) to MAB), the Canada Foundation  
330 for Innovation through Exceptional Opportunities Fund – COVID-19 awards (to MAB, MD, MN, RP,  
331 ZLB) and the National Institute of Allergy and Infectious Diseases of the National Institutes of Health  
332 (R01AI134229 to RP). MLD and ZLB hold Scholar Awards from the Michael Smith Foundation for  
333 Health Research. LYL was supported by an SFU Undergraduate Research Award. GU and FHO hold  
334 Ph.D. fellowships from the Sub-Saharan African Network for TB/HIV Research Excellence  
335 (SANTHE), a DELTAS Africa Initiative [grant # DEL-15-006]. The DELTAS Africa Initiative is an  
336 independent funding scheme of the African Academy of Sciences (AAS)'s Alliance for Accelerating  
337 Excellence in Science in Africa (AESAs) and supported by the New Partnership for Africa's  
338 Development Planning and Coordinating Agency (NEPAD Agency) with funding from the Wellcome  
339 Trust [grant # 107752/Z/15/Z] and the UK government. The views expressed in this publication are



340 those of the authors and not necessarily those of AAS, NEPAD Agency, Wellcome Trust or the UK  
341 government.

342

### 343 **FIGURE LEGENDS**

344 **Figure 1. Longitudinal antibody binding and neutralization responses to spike RBD following**  
345 **one, two and three COVID-19 vaccine doses. Panel A:** Binding antibody responses to the SARS-  
346 CoV-2 spike RBD in serum, in HCW (blue circles) and older adults (orange circles) who were COVID-  
347 19 naive at study entry, as well as COVID-19 convalescent individuals (black circles) at six timepoints:  
348 prior to vaccination (pre-vax), one month following the first dose, one, three and six months following  
349 the second dose, and one month following the third vaccine dose. Individuals with post-vaccination  
350 infections are indicated by red dots at their first N seropositive time point. Participant Ns are provided  
351 at the bottom of the plot. A thick horizontal red bar represents the median; thinner horizontal red bars  
352 represent the IQR. P-values were computed using the Mann-Whitney U-test (for comparisons between  
353 groups) or the Wilcoxon matched pairs test (for comparisons across time points within a group) and are  
354 uncorrected for multiple comparisons. ULOQ/LLOQ: upper/lower limit of quantification. *Panel B:*  
355 same as A, but for virus neutralization activity, defined as the lowest reciprocal plasma dilution at  
356 which neutralization was observed in all wells of a triplicate assay. Plasma samples showing  
357 neutralization in fewer than three wells at a 1/20 dilution were coded as having a reciprocal dilution of  
358 10, corresponding to the LLOQ in this assay. The highest dilution tested was 1/2560, which  
359 corresponds to the ULOQ. Note that only a subset of pre-vaccine plasma samples was assayed for this  
360 activity.

361

362 **Figure 2: Decay rates of serum binding antibody responses to spike RBD following two COVID-**

363 **19 vaccine doses.** *Panel A:* Temporal declines in serum binding antibody responses to spike RBD  
364 following two vaccine doses in HCW (blue) and older adults (orange) who were COVID-19 naive at  
365 study entry, as well as COVID-19 convalescent participants (black circles). ULOQ: upper limit of  
366 quantification. Only participants with a complete longitudinal data series with no values above the  
367 ULOQ are shown. *Panel B:* Binding antibody half-lives following two COVID-19 vaccine doses,  
368 calculated by fitting an exponential curve to each participant's data shown in panel A. Participant Ns  
369 are indicated at the bottom of the plot. Red bars and whiskers represent the median and IQR. P-values  
370 were computed using the Mann-Whitney U-test and are uncorrected for multiple comparisons.

371

372 **Figure 3: Anti-Omicron IgG binding and ACE2 displacement activities one month after the**

373 **second and third COVID-19 vaccine doses.** *Panel A:* Binding IgG responses in plasma to the wild-  
374 type (WT, ancestral Wuhan strain) and Omicron (OM) S-RBD, measured using the Meso Scale  
375 Diagnostics (MSD) V-Plex assay, in HCW (blue circles) and older adults (orange circles) who  
376 remained COVID-19 naive throughout the study, as well as individuals with prior COVID-19  
377 regardless of infection timing (COVID-19 convalescent; black circles) at one month after the second  
378 and third COVID-19 vaccine doses. Participant Ns are shown at the bottom of the plot. A thick  
379 horizontal red bar represents the median; thinner horizontal red bars represent the IQR. P-values were  
380 computed using the Wilcoxon matched pairs test (for all within-group comparisons) or the Mann-  
381 Whitney U-test (for between-group comparisons) and are uncorrected for multiple comparisons. *Panel*  
382 *B:* same as A, but for ACE2 displacement activity, measured using the V-plex SARS-CoV-2 (ACE2)  
383 assay, where results are reported in terms of % ACE2 displacement.

384

385 **Figure 4: Anti-Omicron neutralization activities one month after the second and third COVID-19**  
386 **vaccine doses.** Neutralization activities, reported as the lowest reciprocal plasma dilution at which  
387 neutralization was observed in all wells of a triplicate assay, against the wild-type (WT, ancestral  
388 WA1/2020 strain) and Omicron (OM) virus isolates a subset of HCW (blue circles) and older adults  
389 (orange circles) who remained COVID-19 naive throughout the study. Participant Ns are shown at the  
390 bottom of the plot. A thick horizontal red bar represents the median; thinner horizontal red bars  
391 represent the IQR. P-values were computed using the Wilcoxon matched pairs test (for within-group  
392 comparisons) or the Mann-Whitney U-test (for between-group comparisons) and are uncorrected for  
393 multiple comparisons.

394 **REFERENCES**

- 395 1. Fisman DN, Bogoch I, Lapointe-Shaw L, McCready J, Tuite AR. Risk Factors Associated With  
396 Mortality Among Residents With Coronavirus Disease 2019 (COVID-19) in Long-term Care  
397 Facilities in Ontario, Canada. *JAMA Netw Open* **2020**; 3:e2015957.
- 398 2. Chinnadurai R, Ogedengbe O, Agarwal P, et al. Older age and frailty are the chief predictors of  
399 mortality in COVID-19 patients admitted to an acute medical unit in a secondary care setting- a  
400 cohort study. *BMC Geriatr* **2020**; 20:409.
- 401 3. Banerjee A, Pasea L, Harris S, et al. Estimating excess 1-year mortality associated with the COVID-  
402 19 pandemic according to underlying conditions and age: a population-based cohort study.  
403 *Lancet* **2020**; 395:1715-25.
- 404 4. Baden LR, El Sahly HM, Essink B, et al. Efficacy and Safety of the mRNA-1273 SARS-CoV-2  
405 Vaccine. *N Engl J Med* **2021**; 384:403-16.
- 406 5. Polack FP, Thomas SJ, Kitchin N, et al. Safety and Efficacy of the BNT162b2 mRNA Covid-19  
407 Vaccine. *N Engl J Med* **2020**; 383:2603-15.
- 408 6. Dagan N, Barda N, Kepten E, et al. BNT162b2 mRNA Covid-19 Vaccine in a Nationwide Mass  
409 Vaccination Setting. *N Engl J Med* **2021**; 384:1412-23.
- 410 7. Grupper A, Rabinowich L, Schwartz D, et al. Reduced humoral response to mRNA SARS-CoV-2  
411 BNT162b2 vaccine in kidney transplant recipients without prior exposure to the virus. *Am J*  
412 *Transplant* **2021**; 21:2719-26.

- 413 8. Massarweh A, Eliakim-Raz N, Stemmer A, et al. Evaluation of Seropositivity Following BNT162b2  
414 Messenger RNA Vaccination for SARS-CoV-2 in Patients Undergoing Treatment for Cancer.  
415 JAMA Oncol **2021**; 7:1133-40.
- 416 9. Monin L, Laing AG, Munoz-Ruiz M, et al. Safety and immunogenicity of one versus two doses of  
417 the COVID-19 vaccine BNT162b2 for patients with cancer: interim analysis of a prospective  
418 observational study. Lancet Oncol **2021**; 22:765-78.
- 419 10. Collier DA, Ferreira I, Kotagiri P, et al. Age-related immune response heterogeneity to SARS-  
420 CoV-2 vaccine BNT162b2. Nature **2021**; 596:417-22.
- 421 11. Muller L, Andree M, Moskorz W, et al. Age-dependent Immune Response to the Biontech/Pfizer  
422 BNT162b2 Coronavirus Disease 2019 Vaccination. Clin Infect Dis **2021**; 73:2065-72.
- 423 12. Brockman MA, Mwimanzi F, Lapointe HR, et al. Reduced magnitude and durability of humoral  
424 immune responses to COVID-19 mRNA vaccines among older adults. J Infect Dis **2021**; Online  
425 ahead of print. Accepted 9 Dec 2021. doi: 10.1093/infdis/jiab592.
- 426 13. Barda N, Dagan N, Cohen C, et al. Effectiveness of a third dose of the BNT162b2 mRNA COVID-  
427 19 vaccine for preventing severe outcomes in Israel: an observational study. Lancet **2021**;  
428 398:2093-100.
- 429 14. Gilboa M, Mandelboim M, Indenbaum V, et al. Early Immunogenicity and safety of the third dose  
430 of BNT162b2 mRNA Covid-19 vaccine among adults older than 60 years; real world experience.  
431 J Infect Dis **2021**; Online ahead of print. Accepted, 29 Nov 2021. doi: 10.1093/infdis/jiab584.

- 432 15. Bar-On YM, Goldberg Y, Mandel M, et al. Protection of BNT162b2 Vaccine Booster against  
433 Covid-19 in Israel. *N Engl J Med* **2021**; 385:1393-400.
- 434 16. Falsey AR, Frenck RW, Jr., Walsh EE, et al. SARS-CoV-2 Neutralization with BNT162b2 Vaccine  
435 Dose 3. *N Engl J Med* **2021**; 385:1627-9.
- 436 17. Mizrahi B, Lotan R, Kalkstein N, et al. Correlation of SARS-CoV-2-breakthrough infections to  
437 time-from-vaccine. *Nat Commun* **2021**; 12:6379.
- 438 18. Goldberg Y, Mandel M, Bar-On YM, et al. Waning Immunity after the BNT162b2 Vaccine in  
439 Israel. *N Engl J Med* **2021**; 385:e85.
- 440 19. Levin EG, Lustig Y, Cohen C, et al. Waning Immune Humoral Response to BNT162b2 Covid-19  
441 Vaccine over 6 Months. *N Engl J Med* **2021**; 385:e84.
- 442 20. Collie S, Champion J, Moultrie H, Bekker LG, Gray G. Effectiveness of BNT162b2 Vaccine  
443 against Omicron Variant in South Africa. *N Engl J Med* **2022**; 386:494-6.
- 444 21. Cele S, Jackson L, Khoury DS, et al. Omicron extensively but incompletely escapes Pfizer  
445 BNT162b2 neutralization. *Nature* **2021**; Online ahead of print. Accepted, 23 Dec 2021. doi:  
446 10.1038/s41586-021-04387-1.
- 447 22. Song JS, Lee J, Kim M, et al. Serial Intervals and Household Transmission of SARS-CoV-2  
448 Omicron Variant, South Korea, 2021. *Emerg Infect Dis* **2022**; 28.
- 449 23. Bentley E, Mee ET, Routley S, et al. Collaborative Study for the Establishment of a WHO  
450 International Standard for SARS-CoV-2 RNA. World Health Organization, Expert Committee on  
451 Biological Standardization **2020**:WHO/BS/2020.402.

- 452 24. Amirthalingam G, Bernal JL, Andrews NJ, et al. Serological responses and vaccine effectiveness  
453 for extended COVID-19 vaccine schedules in England. *Nat Commun* **2021**; 12:7217.
- 454 25. Parry H, Bruton R, Stephens C, et al. Differential immunogenicity of BNT162b2 or ChAdOx1  
455 vaccines after extended-interval homologous dual vaccination in older people. *Immun Ageing*  
456 **2021**; 18:34.
- 457 26. Payne RP, Longet S, Austin JA, et al. Immunogenicity of standard and extended dosing intervals of  
458 BNT162b2 mRNA vaccine. *Cell* **2021**; 184:5699-714 e11.
- 459 27. Cho A, Muecksch F, Schaefer-Babajew D, et al. Anti-SARS-CoV-2 receptor-binding domain  
460 antibody evolution after mRNA vaccination. *Nature* **2021**; 600:517-22.
- 461 28. Stamatatos L, Czartoski J, Wan YH, et al. mRNA vaccination boosts cross-variant neutralizing  
462 antibodies elicited by SARS-CoV-2 infection. *Science* **2021**; 372:1413-8.
- 463 29. Wang Z, Muecksch F, Schaefer-Babajew D, et al. Naturally enhanced neutralizing breadth against  
464 SARS-CoV-2 one year after infection. *Nature* **2021**; 595:426-31.
- 465 30. Tan CW, Chia WN, Qin X, et al. A SARS-CoV-2 surrogate virus neutralization test based on  
466 antibody-mediated blockage of ACE2-spike protein-protein interaction. *Nat Biotechnol* **2020**;  
467 38:1073-8.
- 468 31. Doria-Rose NA, Shen X, Schmidt SD, et al. Booster of mRNA-1273 Strengthens SARS-CoV-2  
469 Omicron Neutralization. *medRxiv* **2021**; Posted 20 Dec 2021. doi:  
470 10.1101/2021.12.15.21267805. Preprint.

- 471 32. Schmidt F, Muecksch F, Weisblum Y, et al. Plasma neutralization properties of the SARS-CoV-2  
472 Omicron variant. medRxiv **2021**; Posted 13 Dec 2021. doi: 10.1101/2021.12.12.21267646.  
473 Preprint.
- 474 33. Garcia-Beltran WF, St Denis KJ, Hoelzemer A, et al. mRNA-based COVID-19 vaccine boosters  
475 induce neutralizing immunity against SARS-CoV-2 Omicron variant. Cell **2022**; 185:457-66 e4.
- 476 34. Muik A, Lui BG, Wallisch AK, et al. Neutralization of SARS-CoV-2 Omicron by BNT162b2  
477 mRNA vaccine-elicited human sera. Science **2022**; 375:678-80.
- 478 35. Debes AK, Xiao S, Egbert ER, et al. Comparison of total and neutralizing SARS-CoV-2 spike  
479 antibodies against omicron and other variants in paired samples after two or three doses of  
480 mRNA vaccine. medRxiv **2022**; Posted 31 Jan 2022. doi: 10.1101/2022.01.26.22269819.  
481 Preprint.
- 482 36. Ai J, Zhang H, Zhang Y, et al. Omicron variant showed lower neutralizing sensitivity than other  
483 SARS-CoV-2 variants to immune sera elicited by vaccines after boost. Emerg Microbes Infect  
484 **2022**; 11:337-43.
- 485 37. Muecksch F, Wang Z, Cho A, et al. Increased Potency and Breadth of SARS-CoV-2 Neutralizing  
486 Antibodies After a Third mRNA Vaccine Dose. bioRxiv **2022**; Posted 15 Jan 2022. doi:  
487 10.1101/2022.02.14.480394. Preprint.:2022.02.14.480394.
- 488 38. Feng S, Phillips DJ, White T, et al. Correlates of protection against symptomatic and asymptomatic  
489 SARS-CoV-2 infection. Nat Med **2021**; 27:2032-40.



- 490 39. Redd AD, Nardin A, Kared H, et al. Minimal cross-over between mutations associated with  
491 Omicron variant of SARS-CoV-2 and CD8+ T cell epitopes identified in COVID-19  
492 convalescent individuals. *bioRxiv* **2021**; Posted 9 Dec 2021. doi: 10.1101/2021.12.06.471446.  
493 Preprint.
- 494 40. Peng Y, Felce SL, Dong D, et al. An immunodominant NP105-113-B\*07:02 cytotoxic T cell  
495 response controls viral replication and is associated with less severe COVID-19 disease. *Nat*  
496 *Immunol* **2022**; 23:50-61.
- 497 41. Swadling L, Diniz MO, Schmidt NM, et al. Pre-existing polymerase-specific T cells expand in  
498 abortive seronegative SARS-CoV-2. *Nature* **2022**; 601:110-7.
- 499 42. Grifoni A, Sidney J, Vita R, et al. SARS-CoV-2 human T cell epitopes: Adaptive immune response  
500 against COVID-19. *Cell Host Microbe* **2021**; 29:1076-92.
- 501 43. Dan JM, Mateus J, Kato Y, et al. Immunological memory to SARS-CoV-2 assessed for up to 8  
502 months after infection. *Science* **2021**; 371:eabf4063.
- 503 44. Riou C, Keeton R, Moyo-Gwete T, et al. Escape from recognition of SARS-CoV-2 variant spike  
504 epitopes but overall preservation of T cell immunity. *Sci Transl Med* **2022**; 14:eabj6824.
- 505 45. Keeton R, Tincho MB, Ngomti A, et al. T cell responses to SARS-CoV-2 spike cross-recognize  
506 Omicron. *Nature* **2022**; Online ahead of print. Accepted, 31 Jan 2022. doi: 10.1038/s41586-022-  
507 04460-3.

- 508 46. Liu J, Chandrashekar A, Sellers D, et al. Vaccines Elicit Highly Conserved Cellular Immunity to  
509 SARS-CoV-2 Omicron. *Nature*; Online ahead of print, 31 Jan 2022. doi: 10.1038/s41586-022-  
510 04465-y.
- 511 47. Steensels D, Pierlet N, Penders J, Mesotten D, Heylen L. Comparison of SARS-CoV-2 Antibody  
512 Response Following Vaccination With BNT162b2 and mRNA-1273. *JAMA* **2021**; 326:1533-5.
- 513 48. Nanduri S, Pilishvili T, Derado G, et al. Effectiveness of Pfizer-BioNTech and Moderna Vaccines  
514 in Preventing SARS-CoV-2 Infection Among Nursing Home Residents Before and During  
515 Widespread Circulation of the SARS-CoV-2 B.1.617.2 (Delta) Variant - National Healthcare  
516 Safety Network, March 1-August 1, 2021. *MMWR Morb Mortal Wkly Rep* **2021**; 70:1163-6.
- 517

**Table 1: Participant characteristics and sampling information**

| Variable category       | Characteristic                                                               | Healthcare Workers (n=81) | Older Adults (n=56) | COVID-19 Convalescent at study entry (n=14) |
|-------------------------|------------------------------------------------------------------------------|---------------------------|---------------------|---------------------------------------------|
| Sociodemographic/health | Age in years, median [IQR] <sup>a</sup>                                      | 41 [35-51]                | 78 [73-83]          | 48 [36-87]                                  |
|                         | Female sex, n (%)                                                            | 61 (75%)                  | 38 (68%)            | 10 (71%)                                    |
|                         | White/Caucasian ethnicity, n (%)                                             | 37 (46%)                  | 43 (77%)            | 7 (50%)                                     |
|                         | Chronic health or immunosuppressive conditions, median [IQR]                 | 0 [0-0]                   | 1 [0-2]             | 0 [0-1]                                     |
| Vaccine information     | Comirnaty, First mRNA Vaccine, n (%)                                         | 80 (99%)                  | 48 (86%)            | 13 (93%)                                    |
|                         | Comirnaty, Second mRNA Vaccine, n (%)                                        | 79 (98%)                  | 46 (82%)            | 13 (93%)                                    |
|                         | Time between first and second doses in days, median [IQR]                    | 97 [91-102]               | 76 [45-85]          | 112 [87-118]                                |
|                         | Comirnaty, Third mRNA Vaccine, n (%) <sup>b</sup>                            | 32/61 (52%)               | 19/47 (40%)         | 3/6 (50%)                                   |
|                         | Time between second and third dose in days, median [IQR]                     | 210 [200-241]             | 169 [160-231]       | 189 [170-194]                               |
| Specimen collection     | Specimens collected pre-vaccine, n (%)                                       | 80 (99%)                  | 49 (88%)            | 13 (93%)                                    |
|                         | Specimens collected one month after first dose, n (%)                        | 79 (98%)                  | 49 (88%)            | 13 (93%)                                    |
|                         | Day of specimen collection one month after first dose, median [IQR] days     | 28 [27-30]                | 30 [28-32]          | 31 [28-32]                                  |
|                         | Specimens collected one month after second dose, n (%)                       | 81 (100%)                 | 55 (98%)            | 14 (100%)                                   |
|                         | Day of specimen collection one month after second dose, median [IQR] days    | 29 [29-32]                | 29 [29-31]          | 32 [30-36]                                  |
|                         | Specimens collected three months after second dose, n (%)                    | 79 (98%)                  | 53 (95%)            | 13 (93%)                                    |
|                         | Day of specimen collection three months after second dose, median [IQR] days | 90 [90-91]                | 90 [89-92]          | 90 [87-91]                                  |
|                         | Specimens collected six months after second dose, n (%)                      | 78 (96%)                  | 40 (71%)            | 10 (71%)                                    |
|                         | Day of specimen collection six months after second dose, median [IQR] days   | 181 [179-182]             | 176 [167-182]       | 180 [179-181]                               |
|                         | Specimens collected one month after third dose, n (%)                        | 61 (75%)                  | 47 (84%)            | 6 (38%)                                     |
|                         | Day of specimen collection one month after third dose, median [IQR] days     | 30 [29-31]                | 32 [29-33]          | 30 [29-30]                                  |
| COVID-19 post-vax       | Anti-N seroconversion during study follow-up                                 | 6 (7.4%)                  | 2 (3.6%)            | -                                           |

<sup>a</sup> interquartile range<sup>b</sup> denominators are the n of specimens collected one month after third dose

**Table 2: Multivariable analysis of the relationship between sociodemographic, health and vaccine-related variables on serum antibody half-life following two-dose COVID-19 mRNA vaccination**

| <b>Outcome measure</b>               | <b>Variable</b>                    | <b>Estimate</b> | <b>95% CI</b>   | <b>p-value</b> |
|--------------------------------------|------------------------------------|-----------------|-----------------|----------------|
| Ab half-life after two vaccine doses | Age (per year)                     | 0.058           | -0.17 to 0.29   | 0.61           |
|                                      | Male sex                           | 5.31            | -2.57 to 13.18  | 0.18           |
|                                      | White ethnicity                    | 3.11            | -4.67 to 10.88  | 0.43           |
|                                      | # chronic conditions (per add'l)   | -4.62           | -8.39 to -0.85  | <b>0.017</b>   |
|                                      | Spikevax as first dose             | 3.37            | -13.26 to 20.00 | 0.69           |
|                                      | Dose interval (per day)            | 0.00014         | -0.16 to 0.16   | 0.99           |
|                                      | COVID-19 convalescent <sup>a</sup> | 13.78           | -0.37 to 27.93  | 0.056          |

<sup>a</sup> participants with positive anti-N serology at study entry

**Table 3: Multivariable analyses of the relationship between sociodemographic, health and vaccine-related variables on Omicron-specific humoral immunogenicity measures following three-dose COVID-19 mRNA vaccination**

| Humoral measure                               | Variable                                    | 1 mo after 3rd dose |                   |               |
|-----------------------------------------------|---------------------------------------------|---------------------|-------------------|---------------|
|                                               |                                             | Estimate            | 95% CI            | p-value       |
| anti-Omicron RBD IgG (log10) <sup>a</sup>     | Age (per year)                              | 0.0035              | -0.0027 to 0.0097 | 0.26          |
|                                               | Male sex                                    | -0.14               | -0.34 to 0.054    | 0.15          |
|                                               | White ethnicity                             | -0.018              | -0.21 to 0.17     | 0.85          |
|                                               | # chronic conditions (per add'l)            | -0.12               | -0.20 to -0.041   | <b>0.0033</b> |
|                                               | Spikevax as third dose (vs. Comirnaty)      | 0.15                | -0.039 to 0.34    | 0.12          |
|                                               | Interval between 1st and 2nd dose (per day) | -0.0066             | -0.012 to -0.0011 | <b>0.020</b>  |
|                                               | Interval between 2nd and 3rd dose (per day) | 0.00043             | -0.0034 to 0.0042 | 0.83          |
|                                               | Days since 3rd vaccine dose                 | -0.0086             | -0.038 to 0.021   | 0.56          |
|                                               | Prior COVID-19 <sup>b</sup>                 | 0.1                 | -0.16 to 0.37     | 0.43          |
| anti-Omicron ACE2 % displacement <sup>a</sup> | Age (per year)                              | 0.29                | -0.046 to 0.63    | 0.090         |
|                                               | Male sex                                    | -12.38              | -23.16 to -1.60   | <b>0.025</b>  |
|                                               | White Ethnicity                             | -2.36               | -12.74 to 8.01    | 0.65          |
|                                               | # chronic conditions (per add'l)            | -6.41               | -10.80 to -2.03   | <b>0.0046</b> |
|                                               | Spikevax as third dose (vs. Comirnaty)      | 1.69                | -8.58 to 11.97    | 0.74          |
|                                               | Interval between 1st and 2nd dose (per day) | -0.41               | -0.71 to -0.11    | <b>0.0079</b> |
|                                               | Interval between 2nd and 3rd dose (per day) | -0.038              | -0.25 to 0.17     | 0.72          |
|                                               | Days since 3rd vaccine dose                 | -1.82               | -3.43 to -0.21    | <b>0.027</b>  |
|                                               | Prior COVID-19 <sup>b</sup>                 | 12.28               | -2.11 to 26.67    | 0.094         |

<sup>a</sup> Measured using the Meso Scale Diagnostics (MSD) V-plex assay system

<sup>b</sup> Includes all participants with positive anti-N serology at any time during the study (*i.e.* both pre- and post-vaccine COVID-19 cases)

**a**

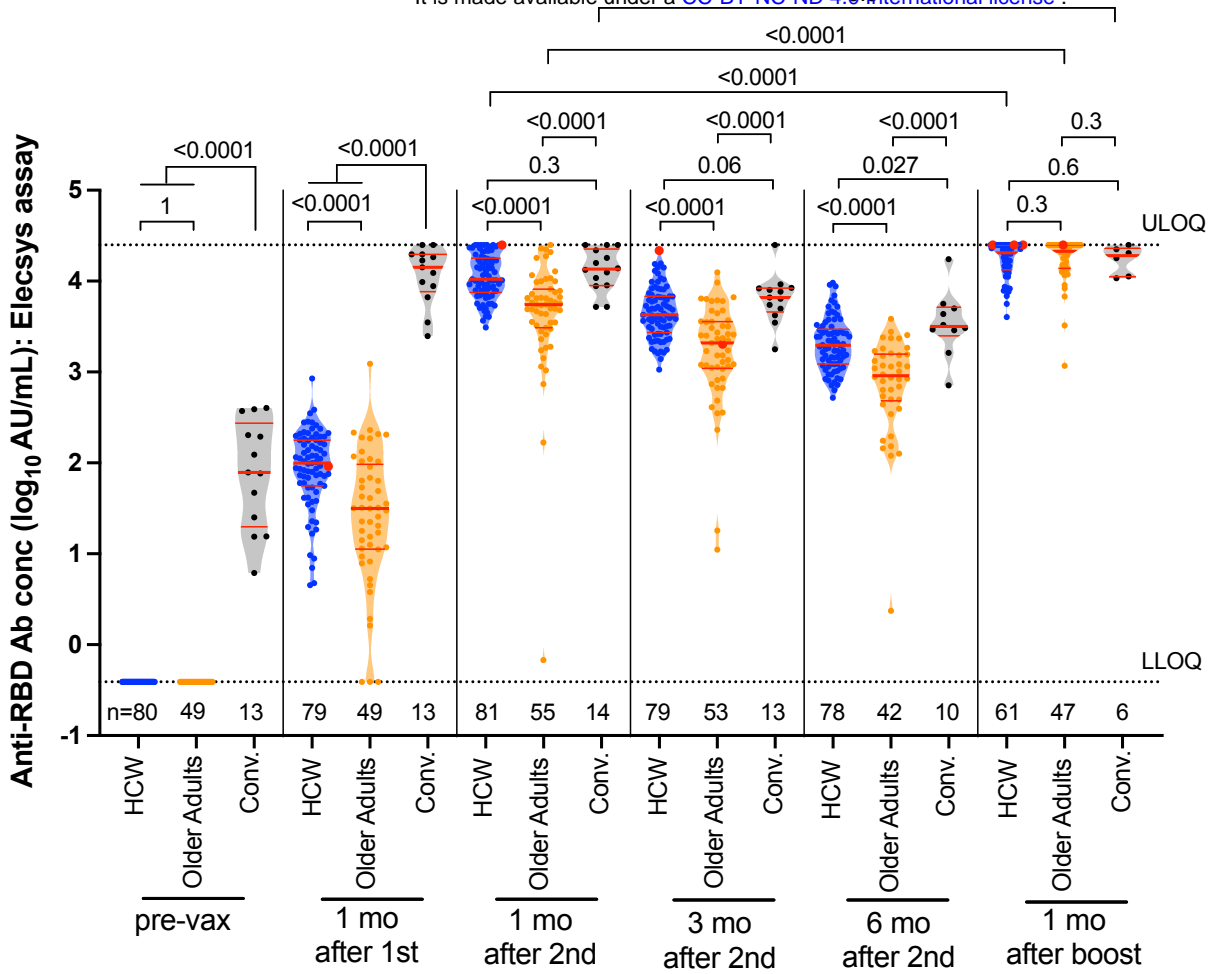

**b**

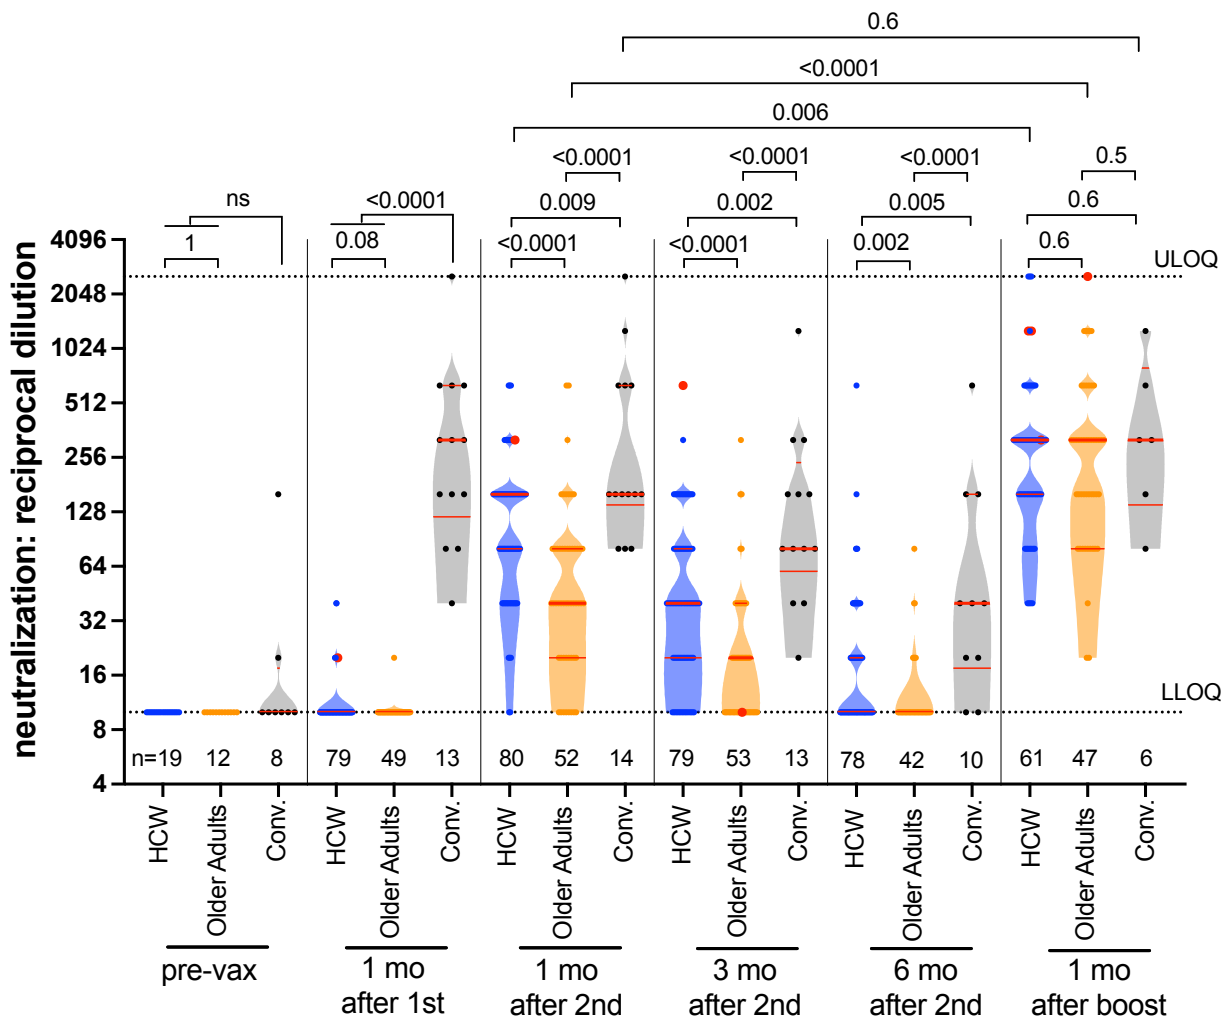

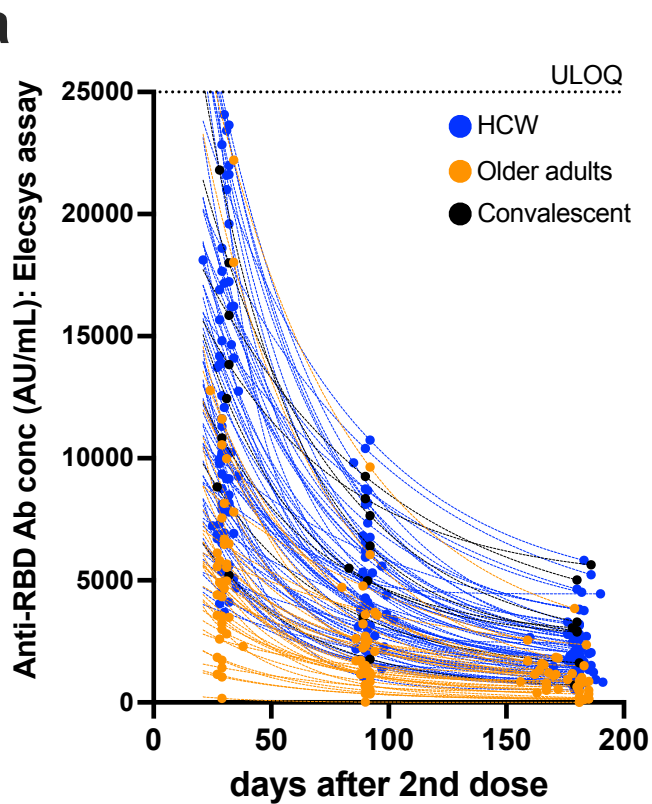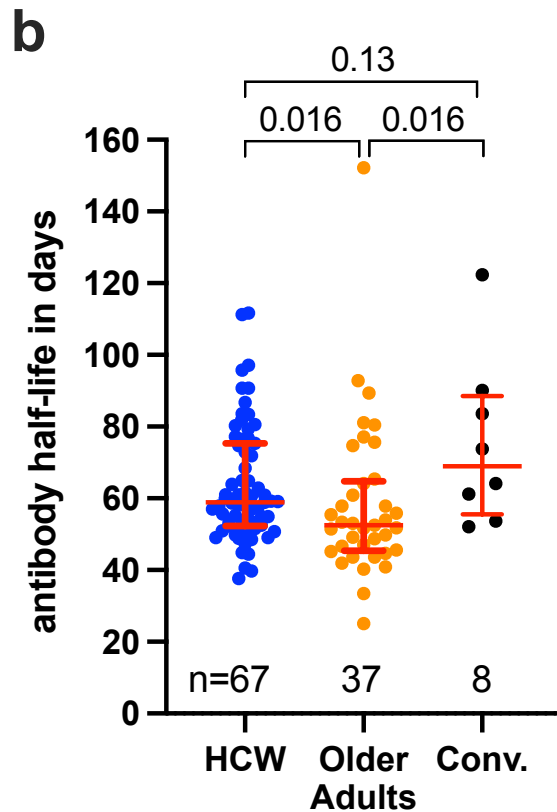

**a**

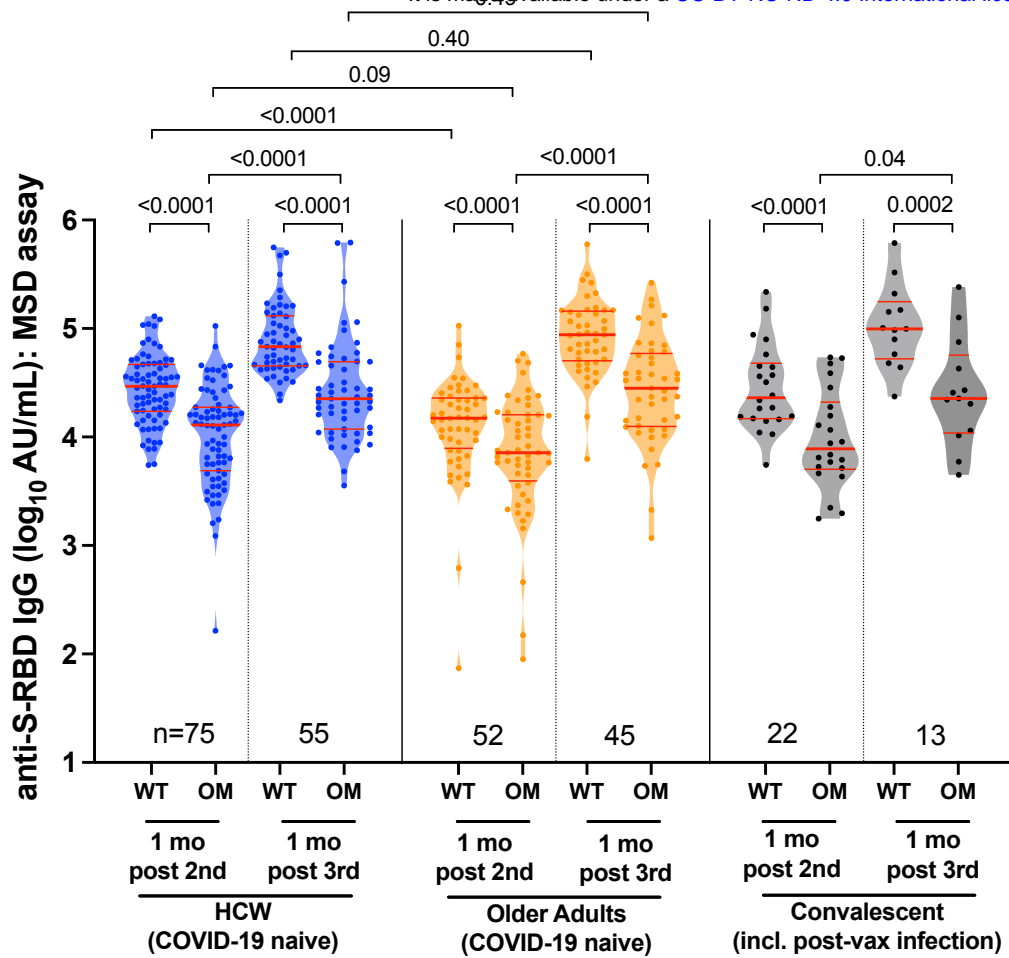

**b**

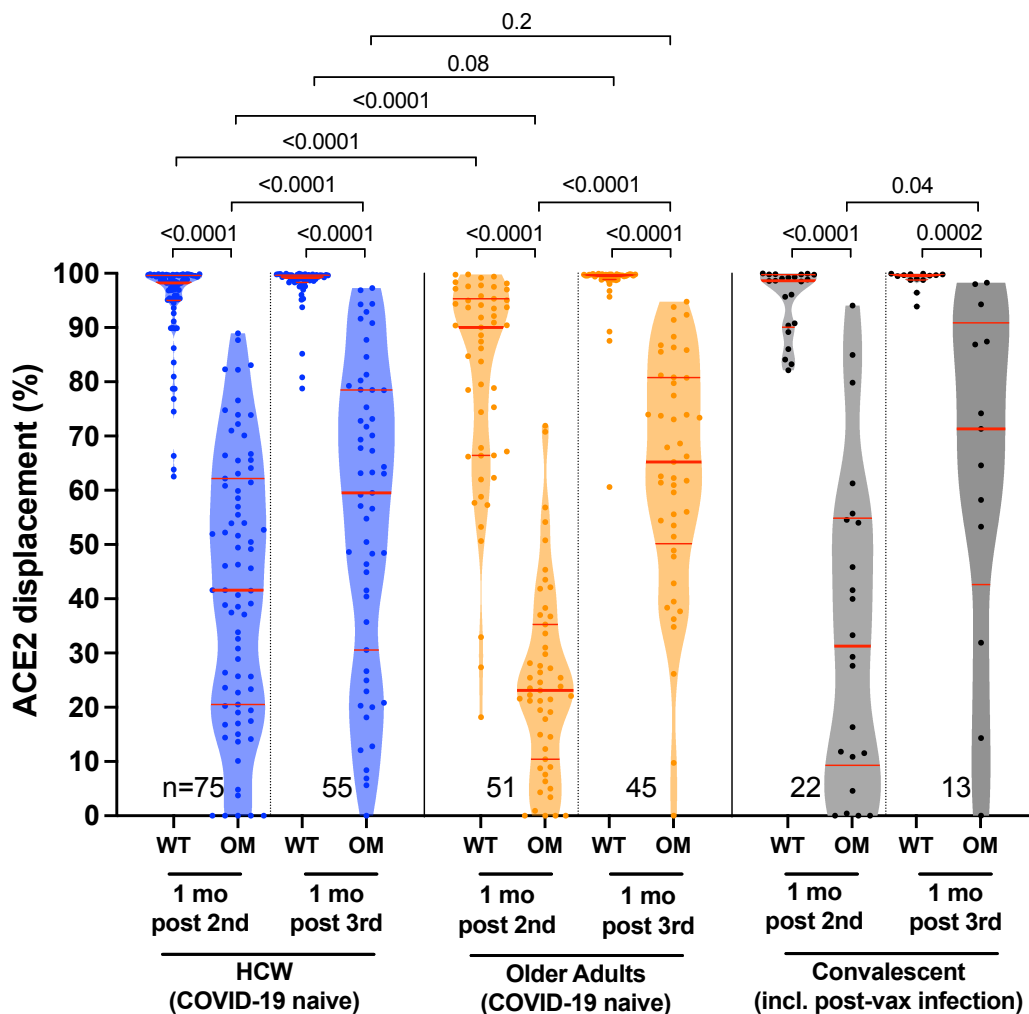



Figure 4

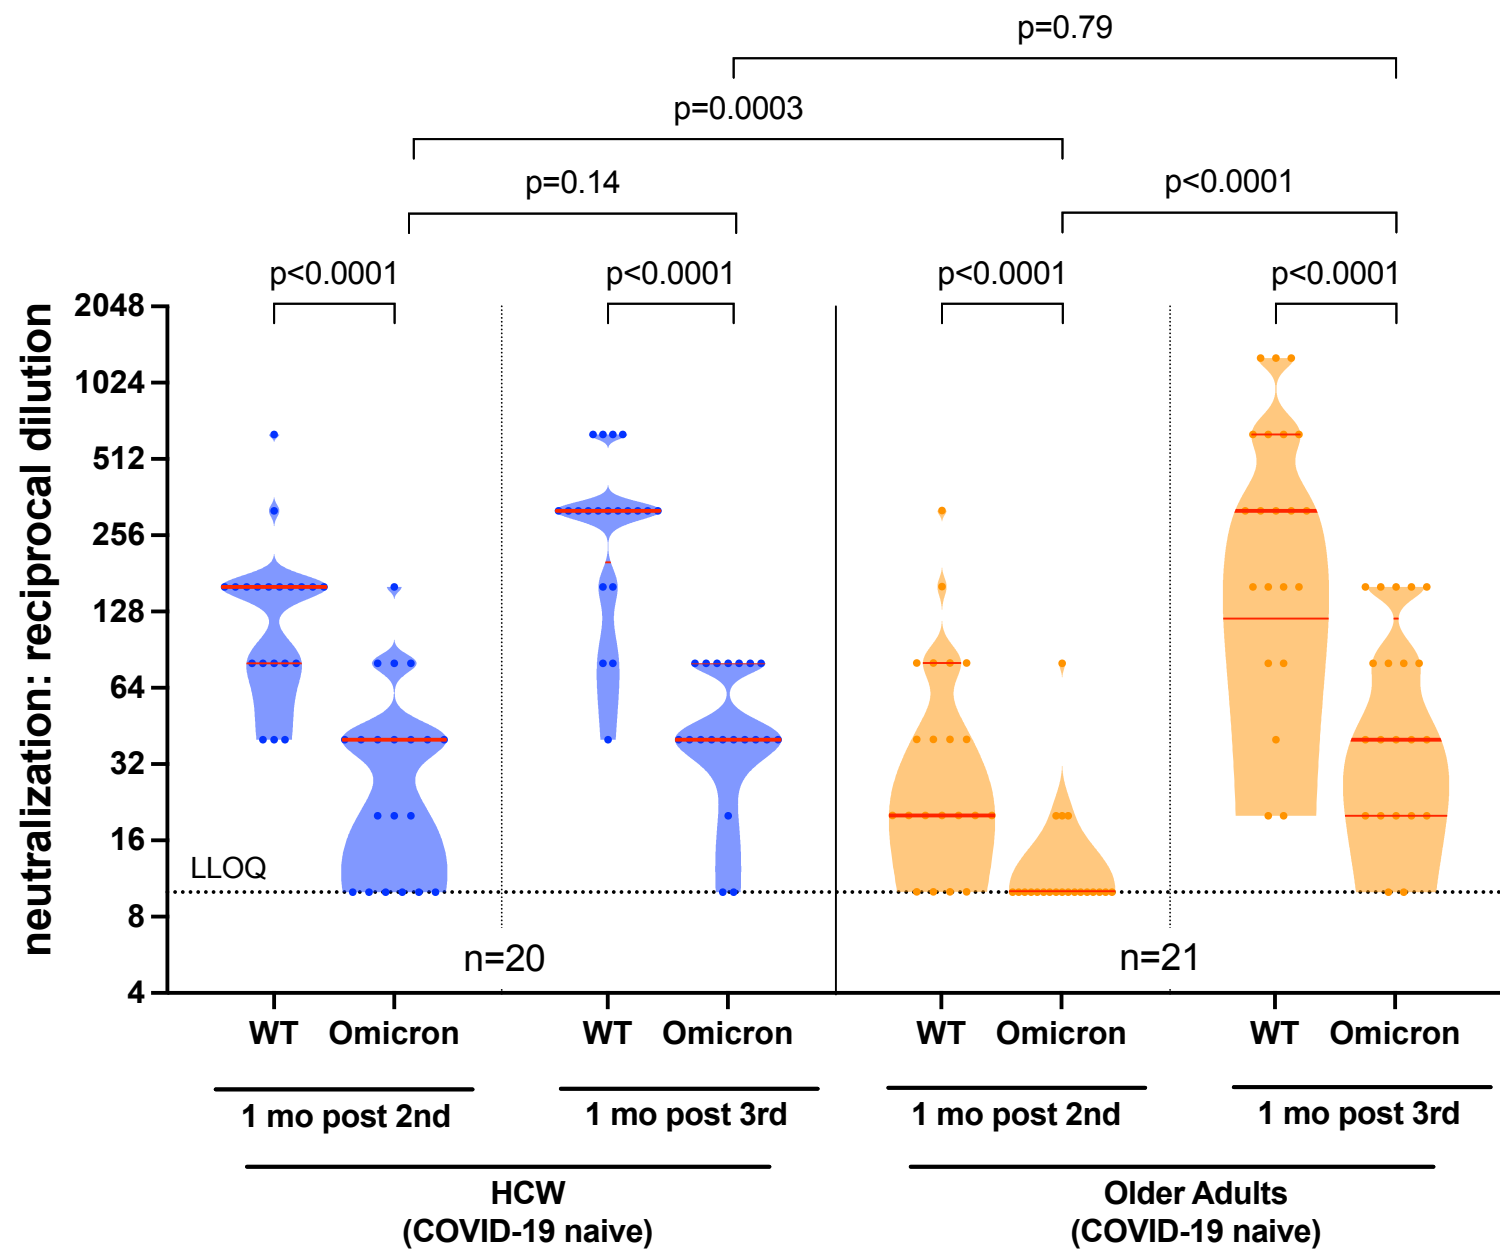

**Table S1: Multivariable analyses of the relationship between sociodemographic, health and vaccine-related variables on immunogenicity measures following two-dose COVID-19 mRNA vaccination**

| Humoral measure                   | Variable                           | 1 mo after 2nd dose |                   |               | 3 mo after 2nd dose |                     |                   | 6 mo after 2nd dose |                   |               |
|-----------------------------------|------------------------------------|---------------------|-------------------|---------------|---------------------|---------------------|-------------------|---------------------|-------------------|---------------|
|                                   |                                    | Estimate            | 95% CI            | p-value       | Estimate            | 95% CI              | p-value           | Estimate            | 95% CI            | p-value       |
| anti-RBD                          | Age (per year)                     | -0.0061             | -0.010 to -0.0017 | <b>0.0067</b> | -0.0047             | -0.0085 to -0.00077 | <b>0.019</b>      | -0.0029             | -0.0076 to 0.0018 | 0.22          |
| Abs                               | Male sex                           | 0.012               | -0.14 to 0.17     | 0.88          | 0.089               | -0.052 to 0.23      | 0.21              | 0.062               | -0.083 to 0.21    | 0.40          |
| (log <sub>10</sub> ) <sup>a</sup> | White ethnicity                    | 0.098               | -0.056 to 0.25    | 0.21          | 0.15                | 0.012 to 0.29       | <b>0.033</b>      | 0.089               | -0.055 to 0.23    | 0.22          |
|                                   | # chronic cond. (per add'l)        | -0.096              | -0.17 to -0.022   | <b>0.011</b>  | -0.11               | -0.18 to -0.047     | <b>0.001</b>      | -0.14               | -0.21 to -0.068   | <b>0.0001</b> |
|                                   | Spikevax as first dose             | 0.25                | -0.038 to 0.54    | 0.088         | 0.32                | 0.054 to 0.59       | <b>0.019</b>      | 0.26                | -0.039 to 0.57    | 0.087         |
|                                   | Dose interval (per day)            | 0.0034              | 0.00011 to 0.0067 | <b>0.043</b>  | 0.0054              | 0.0025 to 0.0083    | <b>0.0003</b>     | 0.0049              | 0.00194 to 0.0079 | <b>0.0014</b> |
|                                   | Days since 2nd dose                | 0.0039              | -0.026 to 0.033   | 0.80          | 0.015               | -0.0098 to 0.040    | 0.24              | 0.00095             | -0.0088 to 0.010  | 0.85          |
|                                   | COVID-19 convalescent <sup>c</sup> | 0.16                | -0.087 to 0.42    | 0.20          | 0.23                | 0.0081 to 0.46      | <b>0.042</b>      | 0.26                | 0.00938 to 0.51   | <b>0.042</b>  |
| Viral                             | Age (per year)                     | -0.018              | -0.033 to -0.0030 | <b>0.019</b>  | -0.020              | -0.034 to -0.0052   | <b>0.008</b>      | -0.0022             | -0.016 to 0.012   | 0.75          |
| neut                              | Male sex                           | -0.33               | -0.85 to 0.18     | 0.21          | 0.22                | -0.30 to 0.75       | 0.40              | 0.14                | -0.29 to 0.57     | 0.53          |
| (log <sub>2</sub> ) <sup>b</sup>  | White ethnicity                    | -0.075              | -0.59 to 0.43     | 0.77          | 0.27                | -0.24 to 0.78       | 0.30              | 0.067               | -0.36 to 0.49     | 0.76          |
|                                   | # chronic cond. (per add'l)        | -0.10               | -0.34 to 0.14     | 0.42          | -0.16               | -0.40 to 0.095      | 0.22              | -0.0080             | -0.21 to 0.20     | 0.94          |
|                                   | Spikevax as first dose             | 0.86                | -0.098 to 1.82    | 0.078         | 0.71                | -0.30 to 1.7        | 0.17              | 0.81                | -0.088 to 1.71    | 0.077         |
|                                   | Dose interval (per day)            | 0.0066              | -0.0044 to 0.018  | 0.24          | -0.00046            | -0.011 to 0.010     | 0.93              | 0.0074              | -0.0015 to 0.016  | 0.10          |
|                                   | Days since 2nd dose                | 0.0040              | -0.094 to 0.10    | 0.94          | -0.066              | -0.16 to 0.026      | 0.16              | 0.010               | -0.019 to 0.039   | 0.48          |
|                                   | COVID-19 convalescent              | 1.64                | 0.81 to 2.47      | <b>0.0001</b> | 1.84                | 1.0 to 2.7          | <b>&lt;0.0001</b> | 1.46                | 0.72 to 2.19      | <b>0.0002</b> |

measured using the Elecsys Anti-SARS-CoV-2 S assay

for viral neutralization, reciprocal plasma dilutions were log<sub>2</sub> transformed prior to multivariable analysis.

participants with positive anti-N serology at study entry

**Table S2: Multivariable analyses of the relationship between sociodemographic, health and vaccine-related variables on humoral responses following three-dose COVID-19 mRNA vaccination**

| Humoral measure                                | Variable                                    | 1 mo after 3rd dose |                   |               |
|------------------------------------------------|---------------------------------------------|---------------------|-------------------|---------------|
|                                                |                                             | Estimate            | 95% CI            | p-value       |
| anti-RBD Abs (log <sub>10</sub> ) <sup>a</sup> | Age (per year)                              | 0.0018              | -0.0011 to 0.0048 | 0.22          |
|                                                | Male sex                                    | 0.0080              | -0.086 to 0.10    | 0.87          |
|                                                | White ethnicity                             | 0.0089              | -0.082 to 0.10    | 0.85          |
|                                                | # chronic conditions (per add'l)            | -0.053              | -0.091 to -0.014  | <b>0.0078</b> |
|                                                | Spikevax as third dose (vs. Comirnaty)      | 0.12                | 0.030 to 0.21     | <b>0.0091</b> |
|                                                | Interval between 1st and 2nd dose (per day) | -0.00064            | -0.0033 to 0.0020 | 0.63          |
|                                                | Interval between 2nd and 3rd dose (per day) | 0.00037             | -0.0014 to 0.0022 | 0.69          |
|                                                | Days since 3rd vaccine dose                 | 0.0016              | -0.013 to 0.016   | 0.82          |
|                                                | Prior COVID-19 <sup>c</sup>                 | 0.070               | -0.057 to 0.20    | 0.28          |
| Viral neut. (log <sub>2</sub> ) <sup>b</sup>   | Age (per year)                              | 0.022               | 0.0025 to 0.042   | <b>0.028</b>  |
|                                                | Male sex                                    | -0.075              | -0.70 to 0.55     | 0.81          |
|                                                | White ethnicity                             | -0.28               | -0.88 to 0.33     | 0.37          |
|                                                | # chronic conditions (per add'l)            | -0.17               | -0.43 to 0.081    | 0.18          |
|                                                | Spikevax as third dose (vs. Comirnaty)      | 0.70                | 0.11 to 1.29      | <b>0.021</b>  |
|                                                | Interval between 1st and 2nd dose (per day) | 0.012               | -0.0056 to 0.029  | 0.18          |
|                                                | Interval between 2nd and 3rd dose (per day) | 0.013               | 0.00097 to 0.025  | <b>0.035</b>  |
|                                                | Days since 3rd vaccine dose                 | -0.028              | -0.12 to 0.065    | 0.55          |
|                                                | Prior COVID-19 <sup>c</sup>                 | 1.23                | 0.39 to 2.06      | <b>0.0044</b> |

<sup>a</sup> Measured using the Elecsys Anti-SARS-CoV-2 S assay

<sup>b</sup> Viral neutralization results were log<sub>2</sub>-transformed prior to multivariable analysis

<sup>c</sup> Includes all participants with positive anti-N serology at any time during the study (*i.e.* both pre- and post-vaccine COVID-19 cases)
